# Supplementary material for: Pb-Induced Eryptosis May Provoke Thrombosis Prior to Hemolysis
Source: MDPI journal article supplement (doi:10.3390/ijms23137008), 2022-06-23
Supplement: s1 [file s1]

## Supplementary Materials:

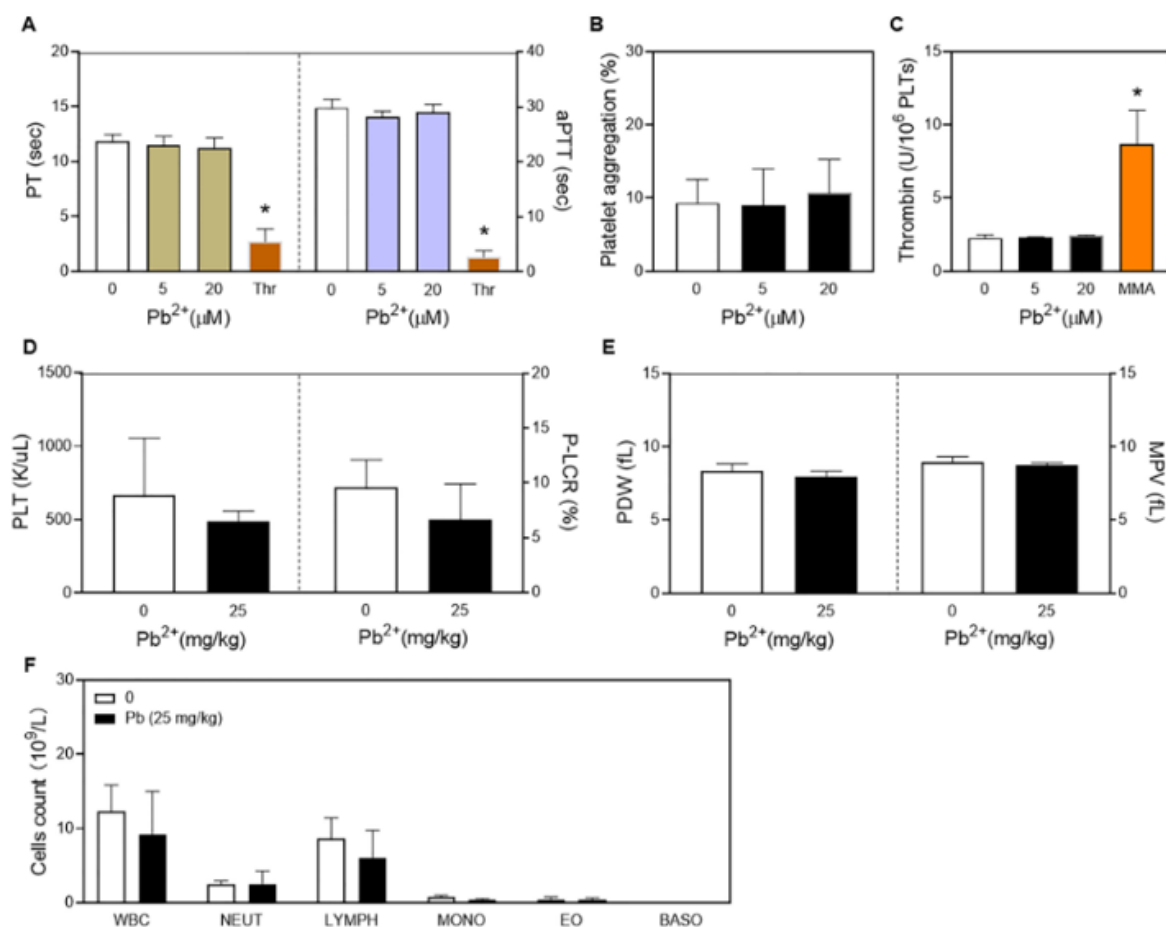

**Figure S1. Estimation of platelets and white blood cells after Pb exposure.** (A) Plasma coagulation was evaluated by prothrombin time (PT) and activated partial thromboplastin time (aPTT) after isolated human plasma was incubated with 0, 5 and 20  $\mu\text{M}$  Pb for 1 h. Thrombin (2 U/ml) was used as positive control. (B) Platelet aggregation and (C) thrombin generation were tested using isolate human platelets after Pb treatment. Monomethylarsonous acid (MMA(III)) (50  $\mu\text{M}$ ) was used as positive control. (D) After 25 mg/kg Pb exposure to mice for 1 h, the platelets counts, P-LCR% (platelet large cell ratio, PLCR), (E) PDW (platelet distribution width, PDW), MPV (mean platelet volume, MPV) were all tested. In addition, (F) WBC (White blood cell, WBC), NEUT (Neutrophil, NEUT); LYMPH (Lymphocytes, LYMPH), MONO (Monocytes, MONO), EO (Eosinophil, EO), BASO (Basophil, BASO) were also determined using hematology analyzer. Values are mean  $\pm$  SD of three independent experiments, \* Statistical difference compared with control ( $p < 0.05$ ).
